# Supplementary material for: Copper oxide hierarchical morphology derived from MOF precursors for enhancing ethanol vapor sensing performance
Source: Royal Society of Chemistry journal article supplement (doi:10.1039/d0tc01425g), 2020-01-01
Supplement: d0tc01425g1.pdf [file d0tc01425g1.pdf]

## Supporting information

### Copper oxide hierarchical morphology derived from MOF precursors for enhancing ethanol vapor sensing performance

Sha Wang,<sup>a</sup> Zhimin Gao<sup>a</sup>, Guoshuai Song,<sup>a</sup> Yantao Yu,<sup>a</sup> Wenxiu He,<sup>a</sup> Linlin Li,<sup>a</sup>  
Tieqiang Wang,<sup>a</sup> Fuqiang Fan,<sup>a</sup> Yunong Li,<sup>a</sup> Liying Zhang,<sup>a</sup> Xuemin Zhang,<sup>\*a</sup> Yu Fu<sup>\*a</sup>  
and Wei Qi<sup>\*b</sup>

<sup>a</sup> Department of Chemistry, College of Sciences, Northeastern University, Shenyang 110819, P. R. China. \*E-mail: fuyu@mail.neu.edu.cn (Y. Fu), zhangxuemin@mail.neu.edu.cn (X. M. Zhang)

<sup>b</sup> Shenyang National Laboratory for Materials Science, Institute of Metal Research, Chinese Academy of Sciences, Shenyang 110016, P. R. China. \*E-mail: wqi@imr.ac.cn (W. Qi)

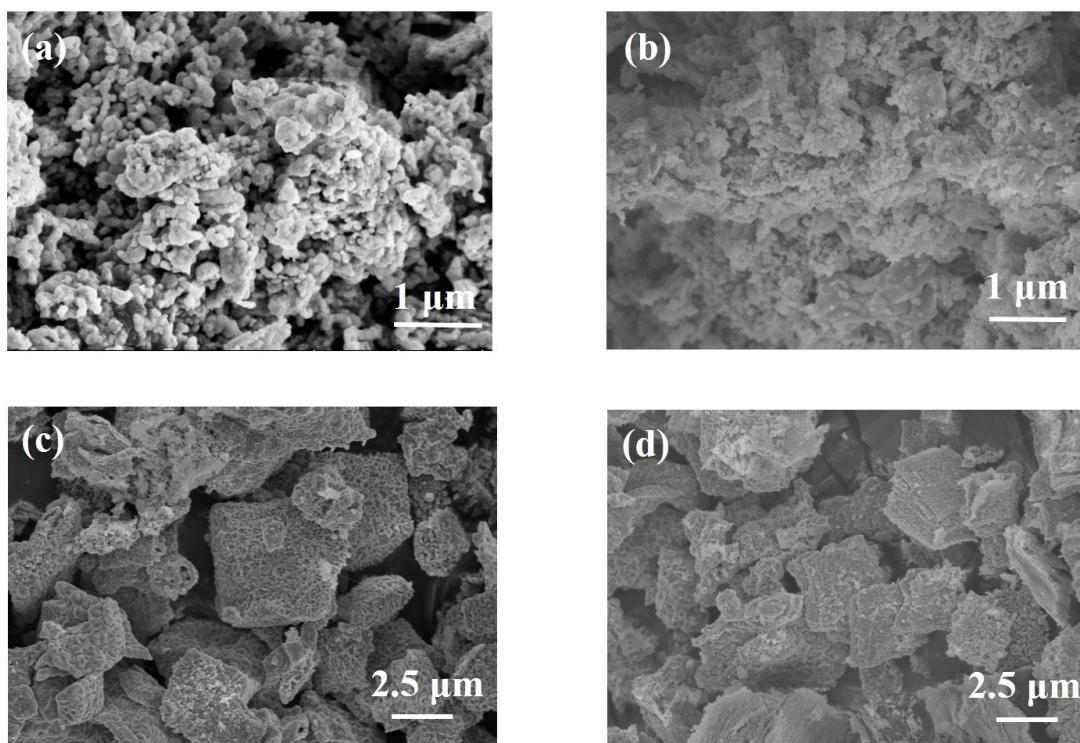

Figure S1 SEM images of (a) Rod-like CuBDC precursors calcined at 450 °C for optimum calcination time of 100 min. (b) Rod-like CuBDC precursors calcined at optimum calcination temperature of 350 °C for 250 min. (c) Cube-like Cu(BDC)(DMF) precursors calcined at 450 °C for optimum calcination time of 100 min. (d) Cube-like Cu(BDC)(DMF) precursors calcined at optimum calcination temperature of 350 °C for 250 min.

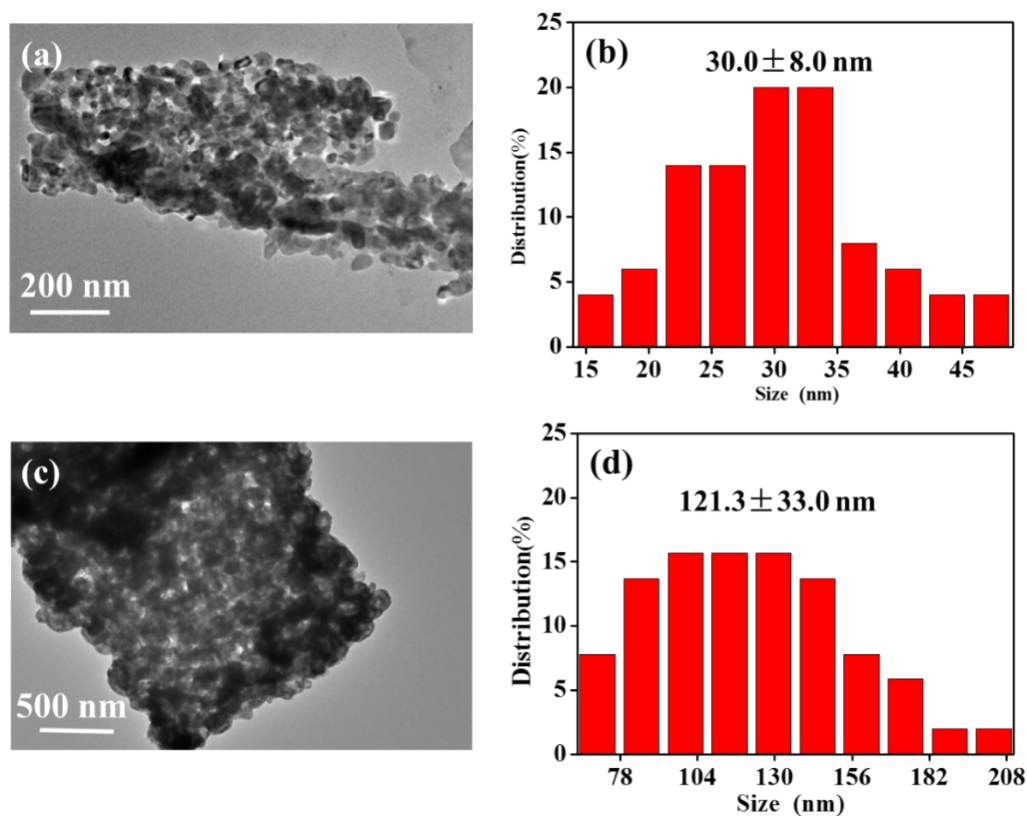

Figure S2 (a) TEM image of rod-like CuO with 30.0 nm particle sizes. (b) Particle size distributions of rod-like CuO in TEM (a) image. (c) TEM image of cube-like CuO with 121.3 nm particle sizes. (d) Particle size distributions of cube-like CuO in TEM (c) image.

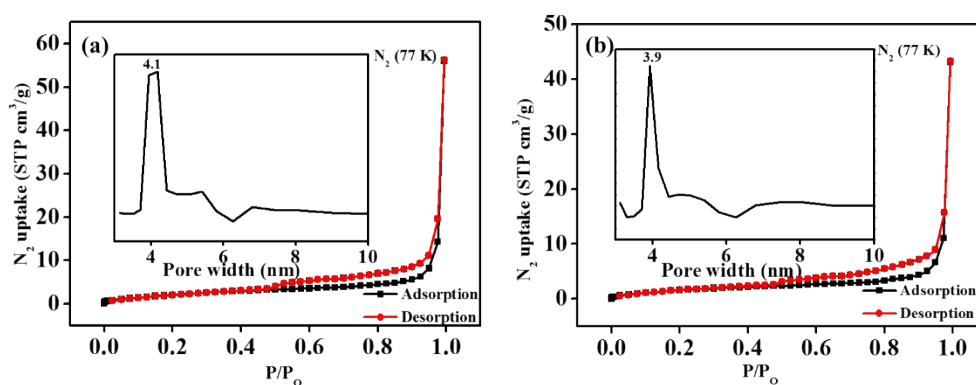

Figure S3 (a)  $N_2$  adsorption-desorption isotherm at 77 K of rod-like CuO. The inset shows pore-size distribution of rod-like CuO (b)  $N_2$  adsorption-desorption isotherm at 77 K of cube-like CuO. The inset shows pore-size distribution of cube-like CuO.

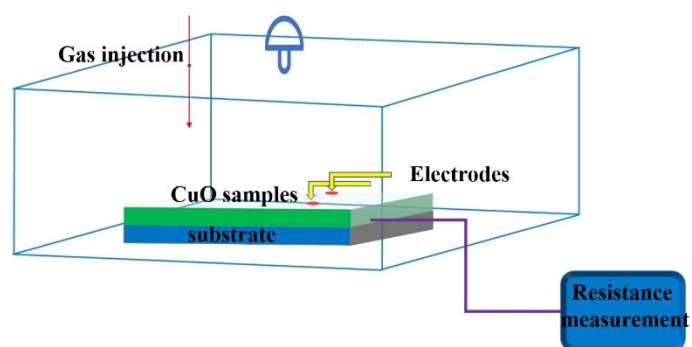

Scheme S1. Schematic drawings of gas sensing measurement system of rod-like and cube-like CuO.

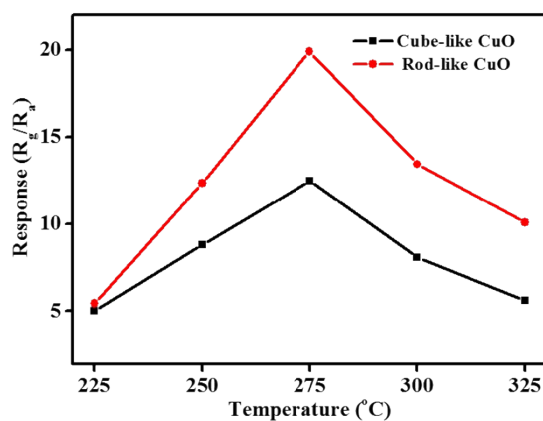

Figure S4 Different gas response for the as-prepared rod-like and cube-like CuO sensor to 200 ppm ethanol at different operating temperatures.

Table S1 Summary of ethanol gas sensors based on different copper oxide morphologies.

| Structure/<br>morphology | C <sub>2</sub> H <sub>5</sub> OH<br>conc. (ppm) | Gas<br>response<br>(R <sub>g</sub> /R <sub>a</sub> ) | Operating<br>Temperature<br>(°C) | Year<br>of<br>publication | Ref. |
|--------------------------|-------------------------------------------------|------------------------------------------------------|----------------------------------|---------------------------|------|
| nanoparticles            | 100                                             | 2.39                                                 | 200                              | 2012                      | [9]  |
| Nanoleaves               | 1500                                            | 8.22                                                 | 260                              | 2015                      | [10] |
| Nanorod (film)           | 100                                             | ~5                                                   | 210                              | 2011                      | [11] |
| Wormlike CuO (film)      | 100                                             | ~4.7                                                 | 220                              | 2012                      | [30] |
| nanoribbons              | 100                                             | ~2.2                                                 | 200                              | 2008                      | [31] |
| nanoplates (film)        | 100                                             | 4.11                                                 | 200                              | 2012                      | [32] |
| Nanowires                | 1000                                            | 1.5                                                  | 240                              | 2009                      | [33] |
| Nanoplates               | 500                                             | ~7                                                   | 150                              | 2014                      | [34] |
| Nanocubes                | 300                                             | 1.51                                                 | 300                              | 2014                      | [35] |
| rod-like CuO             | 100                                             | 12.1                                                 | 275                              | This work                 |      |
|                          | 200                                             | 19.9                                                 | 275                              |                           |      |
|                          | 300                                             | 24.1                                                 | 275                              |                           |      |
|                          | 400                                             | 28.9                                                 | 275                              |                           |      |
|                          | 500                                             | 37.4                                                 | 275                              |                           |      |
| cube-like CuO            | 100                                             | 8.7                                                  | 275                              | This work                 |      |
|                          | 200                                             | 12.5                                                 | 275                              |                           |      |
|                          | 300                                             | 15.2                                                 | 275                              |                           |      |
|                          | 400                                             | 19.4                                                 | 275                              |                           |      |
|                          | 500                                             | 22.9                                                 | 275                              |                           |      |

Table S2 Summary of ethanol gas sensors based on different materials.

| Materials                                       | C <sub>2</sub> H <sub>5</sub> OH<br>conc. (ppm) | Gas<br>response<br>(R <sub>g</sub> /R <sub>a</sub> ) | Operating<br>temperature | Year<br>publication | of<br>Ref. |
|-------------------------------------------------|-------------------------------------------------|------------------------------------------------------|--------------------------|---------------------|------------|
| ZnO nanowires                                   | 100                                             | 5.07                                                 | 240                      | 2008                | [36]       |
| V <sub>2</sub> O <sub>5</sub> /SnO <sub>2</sub> | 1000                                            | 14                                                   | 25                       | 2015                | [37]       |
| Nanowires                                       |                                                 |                                                      |                          |                     |            |
| In <sub>2</sub> O <sub>3</sub> nanowires        | 100                                             | ~2                                                   | 370                      | 2004                | [38]       |
| Co <sub>3</sub> O <sub>4</sub>                  | 500                                             | 18.8                                                 | 210                      | 2018                | [39]       |
| Fe <sub>2</sub> O <sub>3</sub>                  | 200                                             | ~6                                                   | 300                      | 2016                | [40]       |
| NiO/SnO <sub>2</sub> thin film                  | 100                                             | 7.9                                                  | 250                      | 2017                | [41]       |
| NiO /MWCNTs                                     | 100                                             | 2                                                    | 180                      | 2015                | [42]       |
| CuO@ZnO                                         | 100                                             | ~5.5                                                 | 240                      | 2016                | [43]       |
| microcubes                                      |                                                 |                                                      |                          |                     |            |
| rod-like CuO                                    | 100                                             | 12.1                                                 | 275                      | This work           |            |
|                                                 | 200                                             | 19.9                                                 | 275                      |                     |            |
|                                                 | 300                                             | 24.1                                                 | 275                      |                     |            |
|                                                 | 400                                             | 28.9                                                 | 275                      |                     |            |
|                                                 | 500                                             | 37.4                                                 | 275                      |                     |            |
| cube-like CuO                                   | 100                                             | 8.7                                                  | 275                      | This work           |            |
|                                                 | 200                                             | 12.5                                                 | 275                      |                     |            |
|                                                 | 300                                             | 15.2                                                 | 275                      |                     |            |
|                                                 | 400                                             | 19.4                                                 | 275                      |                     |            |
|                                                 | 500                                             | 22.9                                                 | 275                      |                     |            |

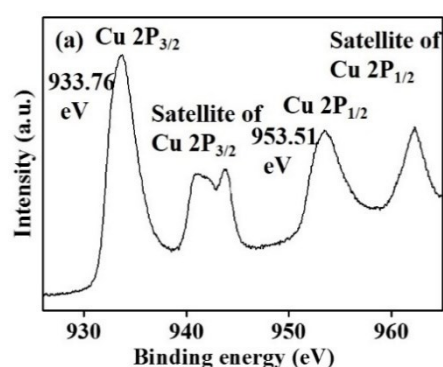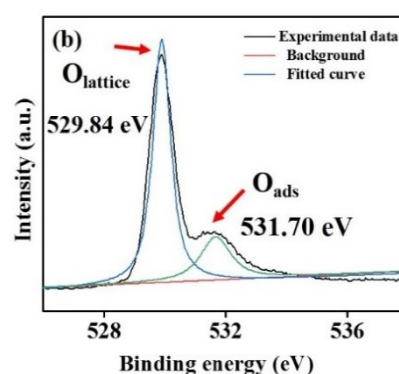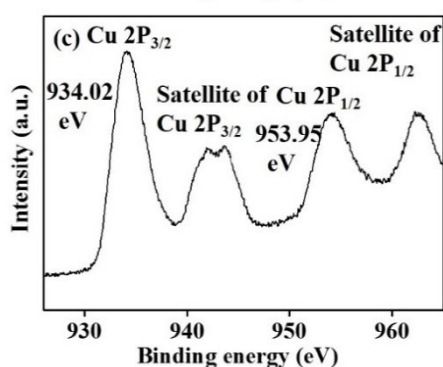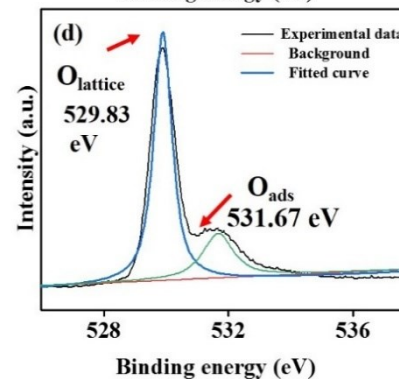

Figure S5 The high-resolution XPS spectra of (a) Cu 2p of rod-like CuO. (b) O 1s of rod-like CuO. (c) Cu 2p of cube-like CuO. (d) O 1s of cube-like CuO.

Equation S1:

$$\log(S_g - 1) = b \cdot \log(C_g) + \log(a) \quad (1)$$

Where

a, b,  $S_g$  and  $C_g$  are the prefactor, absorbed oxygen species charge parameter, the response and tested gas concentration, respectively. The b value is 0.5 or 1, which indicates that the absorbed surface oxygen species on the surface of sensing materials is  $O^{2-}$  or  $O^-$ , respectively.

Equation S2:

$$S_g = \frac{R_{gas}}{R_{air}}$$

$$= \frac{\frac{L_D}{D_C} \exp(-\frac{qV_{air}}{2kT}) \exp(-\frac{\Delta\phi}{2kT}) + \frac{1}{1 + \frac{L_D}{D_G} \exp(-\frac{qV_{air}}{2kT}) \exp(-\frac{\Delta\phi}{2kT})}}{\frac{L_D}{D_C} \exp(-\frac{qV_{air}}{2kT}) + \frac{1}{1 + \frac{L_D}{D_G} \exp(-\frac{qV_{air}}{2kT})}}$$

In which,  $qV_{air}$  is the surface potential barrier in air reference,  $\Delta\phi$  is the difference in the surface potential barrier when exposed to the tested gas versus the value in air, T is absolute temperature, k is the Boltzmann constant, Debye-layer length ( $L_D$ ) is active sensing length,  $D_C$  is effective contact area and  $D_G$  is grain diameter.

Table S3 Response and recovery time of rod-like and cube-like CuO hierarchical morphology sensor to different ethanol concentrations.

| CuO morphology | Gas concentration (ppm) | Response time (s) | Recovery time (s) | Response |
|----------------|-------------------------|-------------------|-------------------|----------|
| rod-like CuO   | 100                     | 102               | 40                | 12.1     |
|                | 200                     | 89                | 35                | 19.9     |
|                | 300                     | 84                | 34                | 24.1     |
|                | 400                     | 89                | 37                | 28.9     |
| cube-like CuO  | 100                     | 152               | 59                | 8.7      |
|                | 200                     | 154               | 51                | 12.5     |
|                | 300                     | 103               | 47                | 15.2     |
|                | 400                     | 121               | 45                | 19.4     |

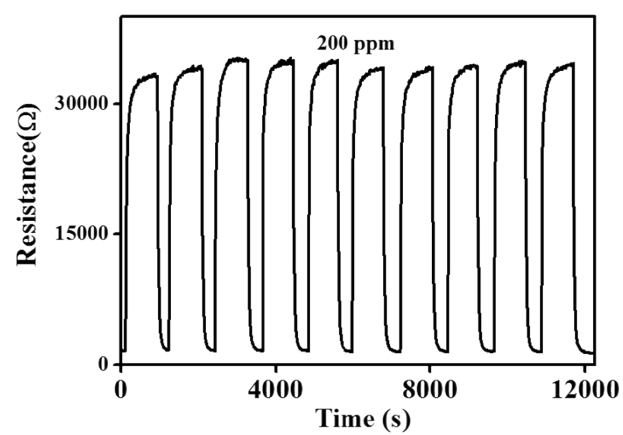

Figure S6 Gas response of rod-like CuO to 200 ppm ethanol after 10 runs at 275 °C and 43 % RH.
